# Supplementary material for: The isolation and analysis of fetal nucleated red blood cells using multifunctional microbeads with a nanostructured coating toward early noninvasive prenatal diagnostics
Source: Royal Society of Chemistry journal article supplement (doi:10.1039/d1tb00005e), 2021-01-01
Supplement: d1tb00005e1.pdf [file d1tb00005e1.pdf]

## Supplementary Information

### Isolation and analysis of fetal nucleated red blood cells using multifunctional microbeads with a nanostructured coating toward early non-invasive pregnant diagnostics

Qilin Zhang<sup>a</sup>, Kelin Zhang<sup>a</sup>, Yuping Guo<sup>b</sup>, Xiaoyun Wei<sup>c</sup>, Yue Sun<sup>a</sup>, Bo Cai<sup>d</sup>, Yunfan Shi<sup>a</sup>,  
Yunxiao Du<sup>a</sup>, Yuling Liu<sup>b\*</sup>, Cuifang Fan<sup>b\*</sup>, and Xing-zhong Zhao<sup>a\*</sup>

a. Key Laboratory of Artificial Micro- and Nano-Structures of Ministry of Education, School of Physics and  
Technology, Wuhan University, Wuhan 430072, China.

b. Department of Obstetrics and Gynecology, Renmin Hospital of Wuhan University, Wuhan, Hubei, China.

c. Key Laboratory of Medical Information and 3D Bioprinting of Zhejiang Province, Hangzhou Dianzi University,  
Hangzhou 310018, China.

d. Research Center for Tissue Engineering and Regenerative Medicine, Union Hospital, Tongji Medical College,  
Huazhong University of Science and Technology, Wuhan, China.

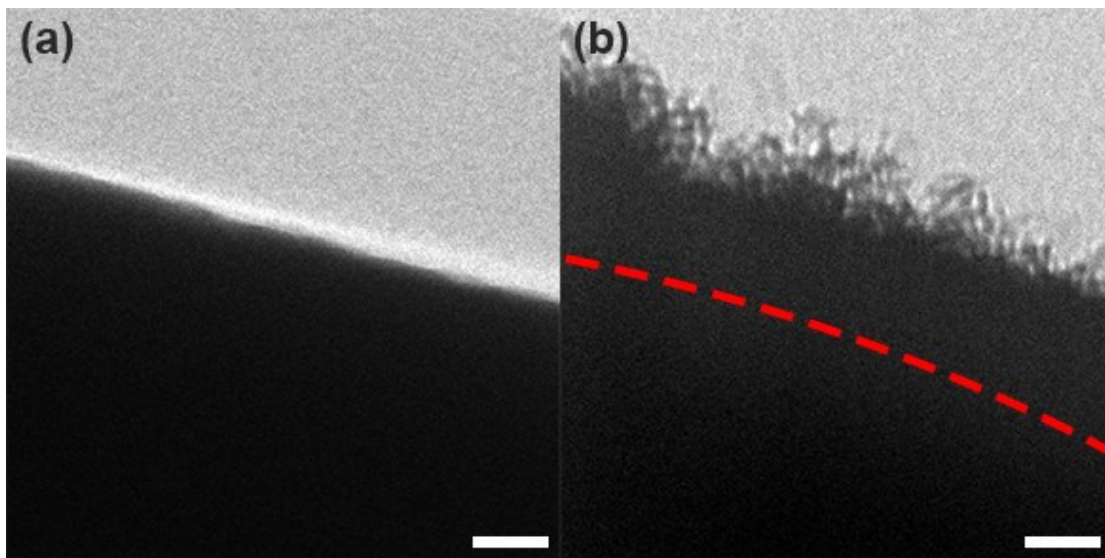

**Figure. S1** The TEM characterization of (a)  $\text{SiO}_2$  microbeads, and (b)  $\text{SiO}_2@ \text{MnO}_2$  microbeads. The scale bars are 200 nm.

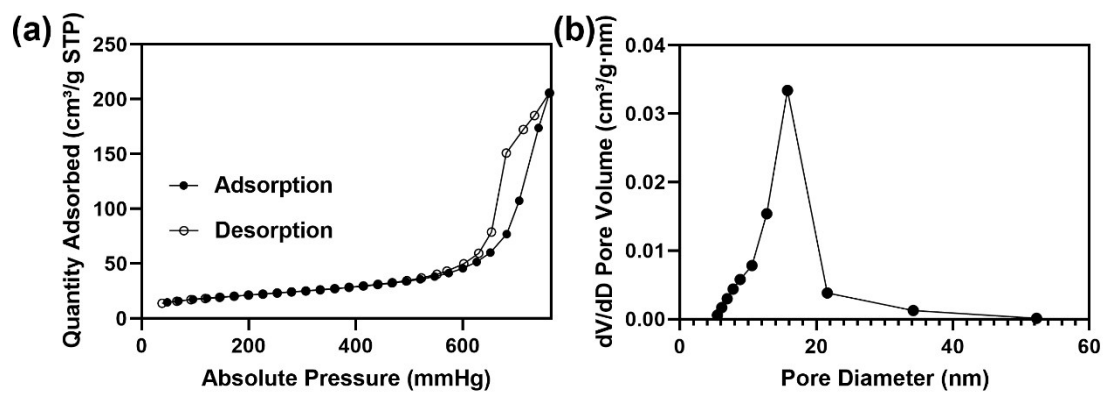

**Figure. S2** The N<sub>2</sub> adsorption/desorption isotherms (a) and pore size distributions (b) of SiO<sub>2</sub>@MnO<sub>2</sub> microbeads.

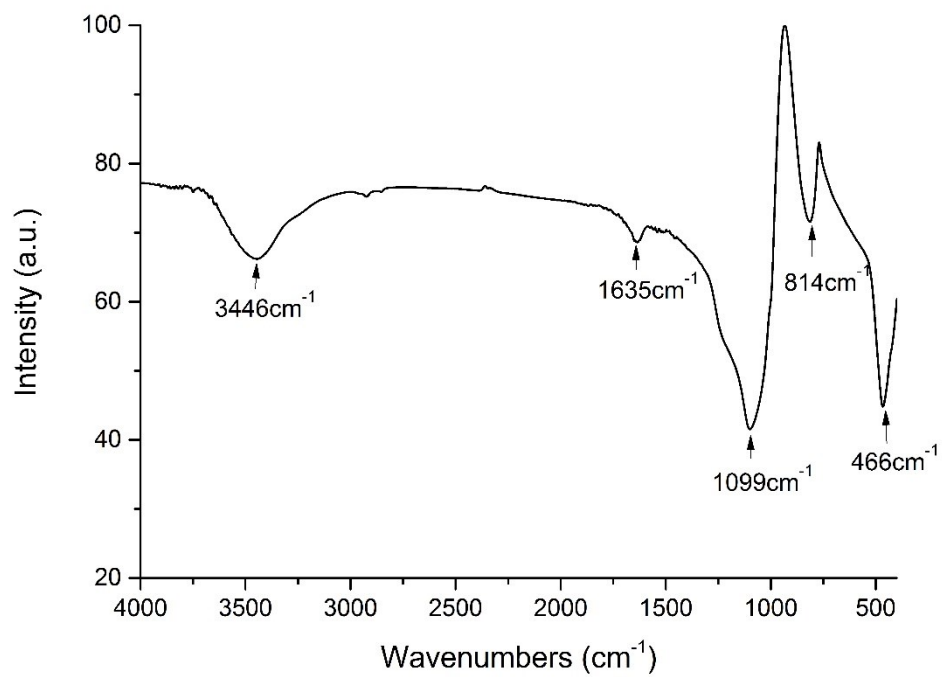

**Figure. S3** Fourier Transform Infrared Spectroscopy (FTIR) analysis shown surface groups of SiO<sub>2</sub>@MnO<sub>2</sub> microbeads.

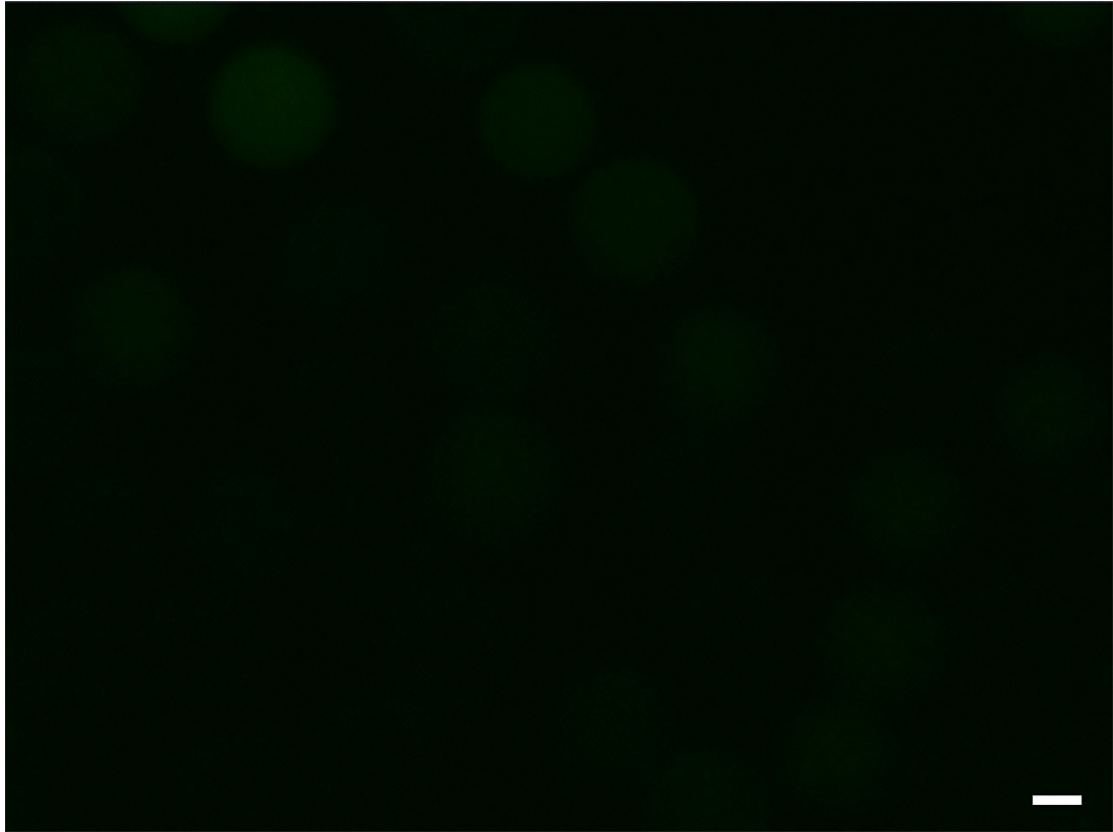

**Figure. S4** The fluorescence microscopic image of SiO<sub>2</sub>@MnO<sub>2</sub> microbeads modified with FITC-labeled streptavidin (scale bar = 20 μm).

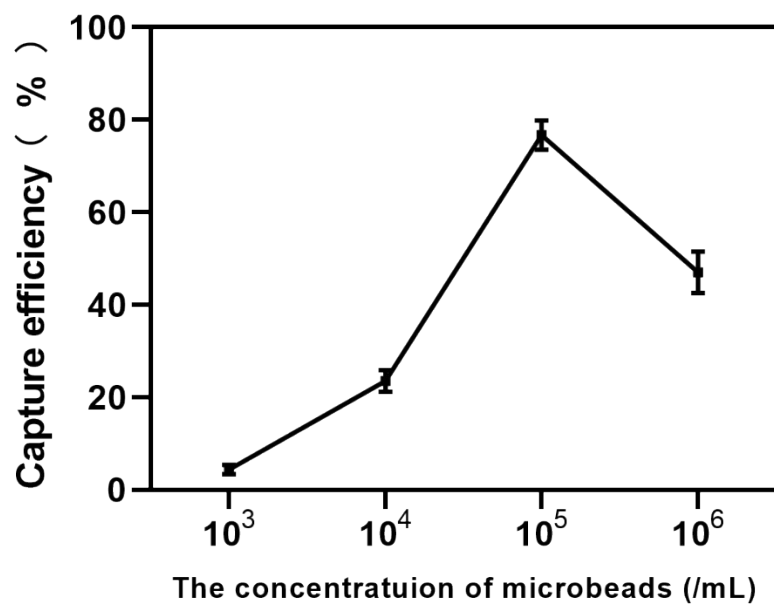

**Figure. S5** Capture efficiency affected by the concentration of  $\text{SiO}_2\text{@MnO}_2$  MBs (n=3).

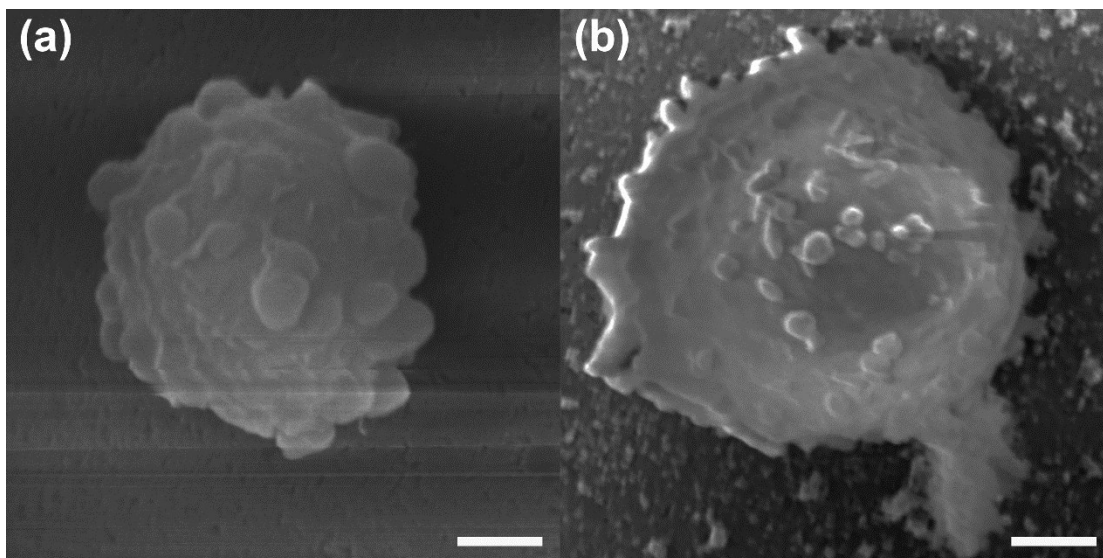

**Figure. S6** The images of nanoparticles after collections of cells in situ. (a) Cell captured by  $\text{SiO}_2$  microbeads (scale bar = 2  $\mu\text{m}$ ). (d) Cell captured by  $\text{SiO}_2@\text{MnO}_2$  microbeads (scale bar = 2  $\mu\text{m}$ ). The cell presented spread, and a lot of filopodia are attached to the surface.

**Table.1** Detailed gestational days and fNRBCs counts for 20 blood samples.

| Blood sample (NO.) | Gestational age (day) | fNRBCs counts (/mL) |
|--------------------|-----------------------|---------------------|
| 1                  | 39                    | 9                   |
| 2                  | 41                    | 10                  |
| 3                  | 44                    | 6                   |
| 4                  | 46                    | 10                  |
| 5                  | 47                    | 10                  |
| 6                  | 48                    | 15                  |
| 7                  | 48                    | 13                  |
| 8                  | 48                    | 10                  |
| 9                  | 49                    | 11                  |
| 10                 | 50                    | 14                  |
| 11                 | 50                    | 9                   |
| 12                 | 51                    | 9                   |
| 13                 | 52                    | 14                  |
| 14                 | 52                    | 12                  |
| 15                 | 52                    | 5                   |
| 16                 | 56                    | 10                  |
| 17                 | 57                    | 15                  |
| 18                 | 59                    | 12                  |
| 19                 | 61                    | 11                  |
| 20                 | 62                    | 7                   |
